# Supplementary material for: Large differences of highly oxygenated organic molecules (HOMs) and low-volatile species in secondary organic aerosols (SOAs) formed from ozonolysis of β -pinene and limonene
Source: Copernicus journal article supplement (doi:10.5194/acp-23-8383-2023), 2023-07-26
Supplement: Supplementary file 1 [file acp-23-8383-2023-supplement.pdf]

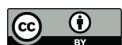

*Supplement of*

**Large differences of highly oxygenated organic molecules (HOMs) and low-volatile species in secondary organic aerosols (SOAs) formed from ozonolysis of  $\beta$ -pinene and limonene**

**Dandan Liu et al.**

*Correspondence to:* Haijie Tong (haijie.tong@hereon.de) and Pingqing Fu (fupingqing@tju.edu.cn)

The copyright of individual parts of the supplement might differ from the article licence.

## SOA formation

Figure S1 indicates that at 565 ppb O<sub>3</sub> condition, the peak concentration of limonene SOA (1484 μg m<sup>-3</sup> for 626 nm particles) is much higher than β-pinene SOA (1152 μg m<sup>-3</sup> for 684 nm particles), partially reflecting the higher SOA yield of limonene ozonolysis. The SOA concentration difference is not as high as ten times, which may be due to the exact concentration of limonene in the flow tube is lower than β-pinene. The evidence is that we observed substantial large particles (diameter > 600 nm) during the β-pinene SOA formation process (Figure S1a). The mass-size distribution of these particles does not change significantly and rapidly when the UV lights are turned off. We infer these large particles (Figure S1a) are β-pinene microdroplets produced during the precursor evaporation or due to condensation. In contrast, negligible number of big particles were observed during the limonene SOA formation process (Figure S1b).

**Table S1.** The experimental conditions, the collected SOA particles quality of  $\beta$ -pinene and limonene SOA. The concentration of gas phase  $\beta$ -pinene and limonene are estimated to be 2-4 ppm and 1-3 ppm, respectively. The number concentration ( $[\text{SOA}]_{\text{number}}$ ) and mass concentrations of SOA ( $[\text{SOA}]_{\text{mass}}$ ) are for particles with sizes ranging from 10 to 1093 nm.

| VOC             | Date       | $[\text{O}_3]$ | $[\text{SOA}]_{\text{number}}$ | $[\text{SOA}]_{\text{mass}}$ | Sampling time |        | Collected SOA |
|-----------------|------------|----------------|--------------------------------|------------------------------|---------------|--------|---------------|
|                 |            | ppb            | $\text{cm}^{-3}$               | $\mu\text{g m}^{-3}$         | Beginning     | Ending | $\mu\text{g}$ |
| $\beta$ -pinene | 13/08/2019 | 315            | 1.61E+06                       | 2085.16                      | 15:24         | 15:57  | 130           |
| $\beta$ -pinene | 13/08/2019 | 315            | 1.81E+06                       | 1767.30                      | 16:00         | 16:31  | 110           |
| $\beta$ -pinene | 13/08/2019 | 565            | 2.08E+06                       | 693.11                       | 19:01         | 19:37  | 190           |
| $\beta$ -pinene | 13/08/2019 | 565            | 1.80E+06                       | 646.12                       | 19:39         | 20:25  | 220           |
| $\beta$ -pinene | 13/08/2019 | 50             | 8.05E+05                       | 3966.64                      | 22:50         | 23:15  | 70            |
| $\beta$ -pinene | 13/08/2019 | 50             | 8.04E+05                       | 4696.83                      | 23:17         | 23:40  | 60            |
| $\beta$ -pinene | 14/08/2019 | 50             | 8.15E+05                       | 5557.75                      | 7:38          | 8:42   | 90            |
| Limonene        | 09/09/2019 | 50             | 3.06E+05                       | 24.99                        | 12:52         | 13:56  | 30            |
| Limonene        | 09/09/2019 | 50             | 3.32E+05                       | 28.57                        | 13:56         | 15:52  | 30            |
| Limonene        | 09/09/2019 | 50             | 3.54E+05                       | 43.20                        | 15:53         | 17:52  | 30            |
| Limonene        | 10/09/2019 | 565            | 1.90E+06                       | 599.65                       | 17:12         | 17:46  | 130           |
| Limonene        | 10/09/2019 | 565            | 1.89E+06                       | 603.14                       | 17:48         | 18:45  | 230           |
| Limonene        | 10/09/2019 | 565            | 1.84E+06                       | 603.34                       | 18:46         | 19:46  | 260           |
| Limonene        | 11/09/2019 | 315            | 1.22E+06                       | 293.89                       | 12:27         | 13:37  | 220           |
| Limonene        | 11/09/2019 | 315            | 1.20E+06                       | 298.18                       | 13:38         | 14:44  | 150           |
| Limonene        | 11/09/2019 | 315            | 1.16E+06                       | 300.47                       | 14:46         | 15:48  | 210           |

**Table S2.** Summary of the top fifteen molecules in relative abundance in  $\beta$ -pinene and limonene SOA that formed at 50, 315, and 565 ppb ozone, respectively.

| Classified   | Molecular formula                              | Molecular weight | Relative abundance (%) |                        |                        |                       |                        |                        |
|--------------|------------------------------------------------|------------------|------------------------|------------------------|------------------------|-----------------------|------------------------|------------------------|
|              |                                                |                  | $\beta$ -pinene SOA    |                        |                        | limonene SOA          |                        |                        |
|              |                                                |                  | 50 ppb O <sub>3</sub>  | 315 ppb O <sub>3</sub> | 565 ppb O <sub>3</sub> | 50 ppb O <sub>3</sub> | 315 ppb O <sub>3</sub> | 565 ppb O <sub>3</sub> |
| Monomer      | C <sub>8</sub> H <sub>12</sub> O <sub>4</sub>  | 172              | 3                      | 18                     | 17                     | 5                     | 2                      | 2                      |
|              | C <sub>9</sub> H <sub>18</sub> O <sub>2</sub>  | 158              | 11                     | 7                      | 1                      | 15                    | < 0.5                  | < 0.5                  |
|              | C <sub>9</sub> H <sub>16</sub> O <sub>3</sub>  | 172              | 7                      | 48                     | 21                     | 11                    | 1                      | 1                      |
|              | C <sub>9</sub> H <sub>14</sub> O <sub>3</sub>  | 170              | 19                     | 39                     | 17                     | 53                    | 41                     | 55                     |
|              | C <sub>9</sub> H <sub>14</sub> O <sub>4</sub>  | 186              | 10                     | 78                     | 57                     | 37                    | 29                     | 22                     |
|              | C <sub>10</sub> H <sub>16</sub> O <sub>2</sub> | 168              | 9                      | 3                      | < 0.5                  | 14                    | < 0.5                  | < 0.5                  |
|              | C <sub>10</sub> H <sub>16</sub> O <sub>3</sub> | 184              | 86                     | 95                     | 35                     | 88                    | 52                     | 66                     |
|              | C <sub>10</sub> H <sub>16</sub> O <sub>4</sub> | 200              | 9                      | 32                     | 19                     | 100                   | 100                    | 100                    |
| Dimer        | C <sub>17</sub> H <sub>26</sub> O <sub>3</sub> | 278              | 2                      | 1                      | < 0.5                  | 42                    | 2                      | 2                      |
|              | C <sub>17</sub> H <sub>26</sub> O <sub>4</sub> | 294              | 100                    | 44                     | 8                      | 13                    | 1                      | 2                      |
|              | C <sub>17</sub> H <sub>26</sub> O <sub>7</sub> | 342              | 4                      | 28                     | 17                     | 20                    | 22                     | 15                     |
|              | C <sub>17</sub> H <sub>26</sub> O <sub>8</sub> | 358              | 2                      | 21                     | 43                     | 10                    | 15                     | 12                     |
|              | C <sub>18</sub> H <sub>22</sub> O <sub>4</sub> | 302              | 4                      | 2                      | 1                      | 1                     | < 0.5                  | < 0.5                  |
|              | C <sub>18</sub> H <sub>26</sub> O <sub>5</sub> | 322              | 2                      | 25                     | 10                     | 5                     | 2                      | 2                      |
|              | C <sub>18</sub> H <sub>28</sub> O <sub>6</sub> | 340              | 2                      | 34                     | 31                     | 19                    | 16                     | 15                     |
|              | C <sub>18</sub> H <sub>28</sub> O <sub>7</sub> | 356              | 1                      | 10                     | 15                     | 27                    | 26                     | 22                     |
|              | C <sub>18</sub> H <sub>30</sub> O <sub>7</sub> | 358              | 1                      | 31                     | 25                     | 7                     | 6                      | 6                      |
|              | C <sub>18</sub> H <sub>26</sub> O <sub>8</sub> | 370              | < 0.5                  | 1                      | 0                      | 13                    | 19                     | 13                     |
|              | C <sub>18</sub> H <sub>28</sub> O <sub>8</sub> | 372              | 1                      | 3                      | 5                      | 25                    | 25                     | 19                     |
|              | C <sub>18</sub> H <sub>30</sub> O <sub>9</sub> | 390              | 2                      | 18                     | 14                     | 3                     | 4                      | 3                      |
|              | C <sub>19</sub> H <sub>28</sub> O <sub>4</sub> | 320              | 9                      | 12                     | 2                      | 17                    | 7                      | 6                      |
|              | C <sub>19</sub> H <sub>32</sub> O <sub>4</sub> | 324              | 5                      | 3                      | 1                      | 5                     | 1                      | < 0.5                  |
|              | C <sub>19</sub> H <sub>30</sub> O <sub>5</sub> | 338              | 3                      | 100                    | 100                    | 74                    | 73                     | 69                     |
|              | C <sub>19</sub> H <sub>28</sub> O <sub>6</sub> | 352              | 1                      | 15                     | 14                     | 51                    | 36                     | 32                     |
|              | C <sub>19</sub> H <sub>30</sub> O <sub>6</sub> | 354              | 2                      | 39                     | 32                     | 48                    | 36                     | 28                     |
|              | C <sub>19</sub> H <sub>28</sub> O <sub>7</sub> | 368              | < 0.5                  | 5                      | 7                      | 48                    | 62                     | 47                     |
|              | C <sub>19</sub> H <sub>30</sub> O <sub>7</sub> | 370              | 4                      | 78                     | 52                     | 85                    | 35                     | 27                     |
|              | C <sub>19</sub> H <sub>28</sub> O <sub>8</sub> | 384              | 1                      | 2                      | 2                      | 30                    | 23                     | 18                     |
|              | C <sub>19</sub> H <sub>30</sub> O <sub>8</sub> | 386              | 1                      | 4                      | 7                      | 21                    | 18                     | 15                     |
|              | C <sub>19</sub> H <sub>28</sub> O <sub>9</sub> | 400              | < 0.5                  | < 0.5                  | < 0.5                  | 17                    | 24                     | 16                     |
| Unclassified | C <sub>16</sub> H <sub>24</sub> O <sub>6</sub> | 312              | 2                      | 26                     | 8                      | 5                     | 5                      | 4                      |
|              | C <sub>23</sub> H <sub>30</sub> O <sub>3</sub> | 354              | 4                      | 2                      | 1                      | 2                     | 0                      | < 0.5                  |
|              | C <sub>32</sub> H <sub>42</sub> O <sub>3</sub> | 474              | 12                     | 0                      | 0                      | 0                     | 0                      | 0                      |

**Table S3.** Dimer HOMs identified by FT-ICR MS analysis of collected particle samples along with observed m/z, proposed molecular formula and molecular structure in SOA produced from ozonolysis of  $\beta$ -pinene and limonene.

| Dimer ID                             | Observed m/z (-) | Molecular formula    | Proposed molecular structure                                                         | Reference                                            |
|--------------------------------------|------------------|----------------------|--------------------------------------------------------------------------------------|------------------------------------------------------|
| <b><math>\beta</math>-Pinene SOA</b> |                  |                      |                                                                                      |                                                      |
| MW 358                               | 357.155          | $C_{17}H_{26}O_8$    | 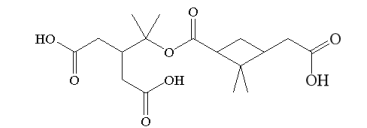   | Kahnt et al. (2018)<br>Kristensen et al. (2017)      |
|                                      |                  |                      | 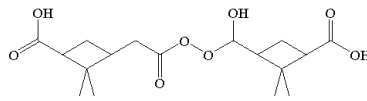   |                                                      |
|                                      |                  |                      | 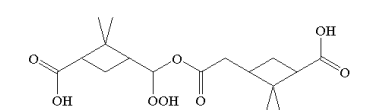   | Mohr et al. (2017)                                   |
|                                      |                  |                      | 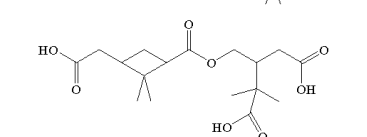   | Mohr et al. (2017)                                   |
|                                      |                  |                      | 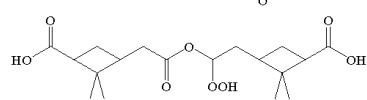   | Kristensen et al. (2017)                             |
| MW 372                               | 371.171          | $C_{18}H_{28}O_8$    | 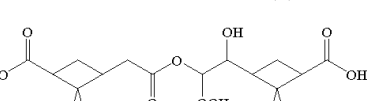   | Kristensen et al. (2017)<br>Kristensen et al. (2016) |
| MW 388                               | 387.166          | $C_{18}H_{28}O_9$    | 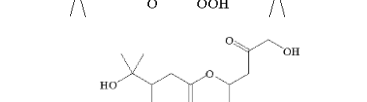  | Kristensen et al. (2017)<br>Kristensen et al. (2016) |
| MW 406                               | 405.177          | $C_{18}H_{30}O_{10}$ | 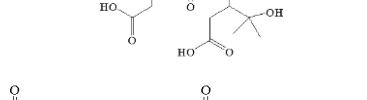 | Kenseth et al. (2018)                                |
| MW 400                               | 399.166          | $C_{19}H_{28}O_9$    | 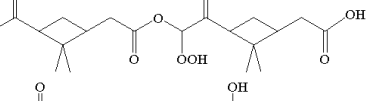 | Kristensen et al. (2017)                             |
| MW 386                               | 385.187          | $C_{19}H_{30}O_8$    | 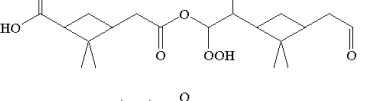 | Kristensen et al. (2017)                             |
| MW 400                               | 399.202          | $C_{20}H_{32}O_8$    | 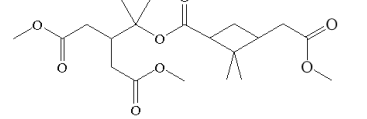 | Kahnt et al. (2018)                                  |
| <b>Limonene SOA</b>                  |                  |                      |                                                                                      |                                                      |
| MW 372                               | 371.171          | $C_{18}H_{28}O_8$    | 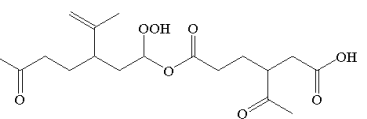 | Hammes et al. (2019)                                 |

MW 386

385.187

 $C_{19}H_{30}O_8$ 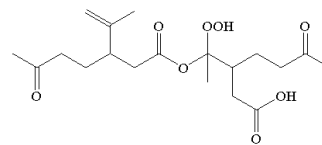

Hammes et al. (2019)

MW 402

401.182

 $C_{19}H_{30}O_9$ 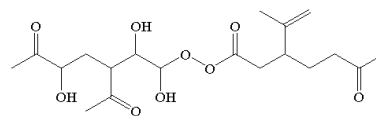

Kundu et al. (2012)

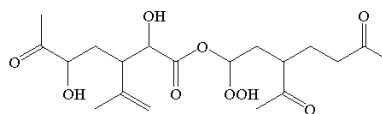

Kundu et al. (2012)

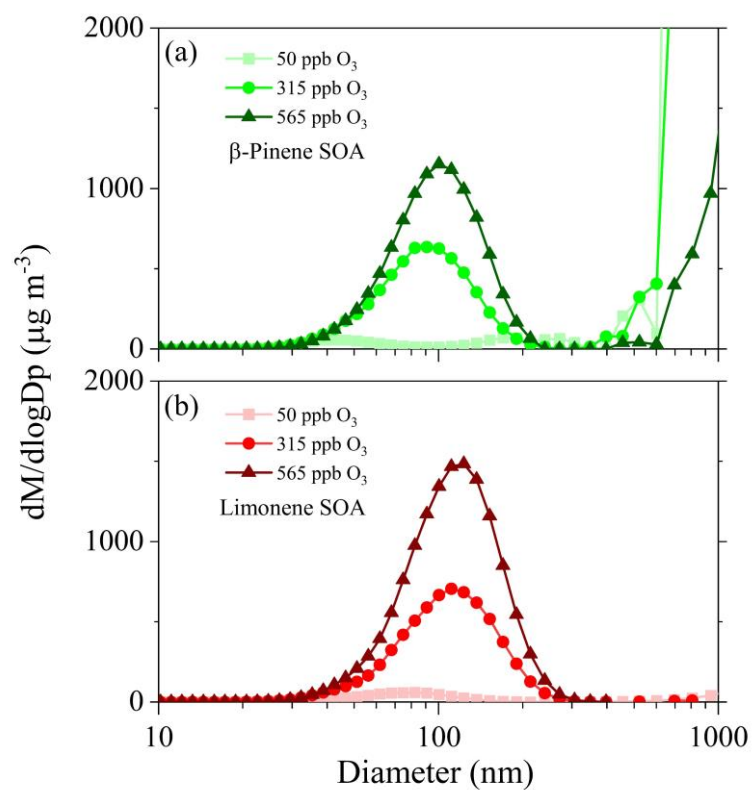

**Figure S1.** Particle size and mass concentration distributions of  $\beta$ -pinene SOA (a) and limonene SOA (b) from SMPS measurement.

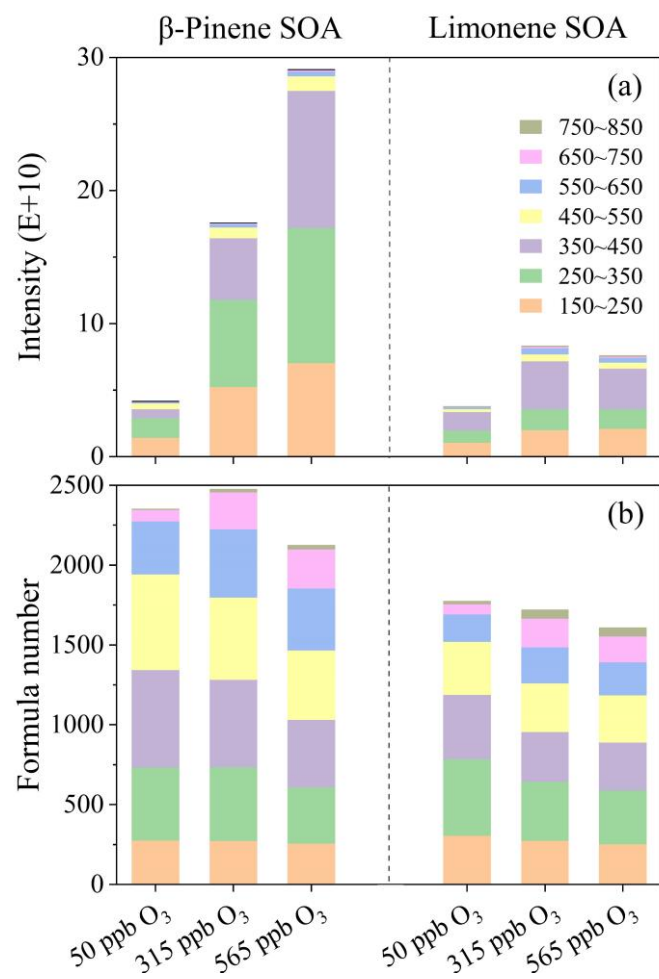

**Figure S2.** The intensity (a) and formula number (b) of molecular weight distributions for  $\beta$ -pinene and limonene SOA at 50 ppb, 315 ppb and 565 ppb ozone concentrations.

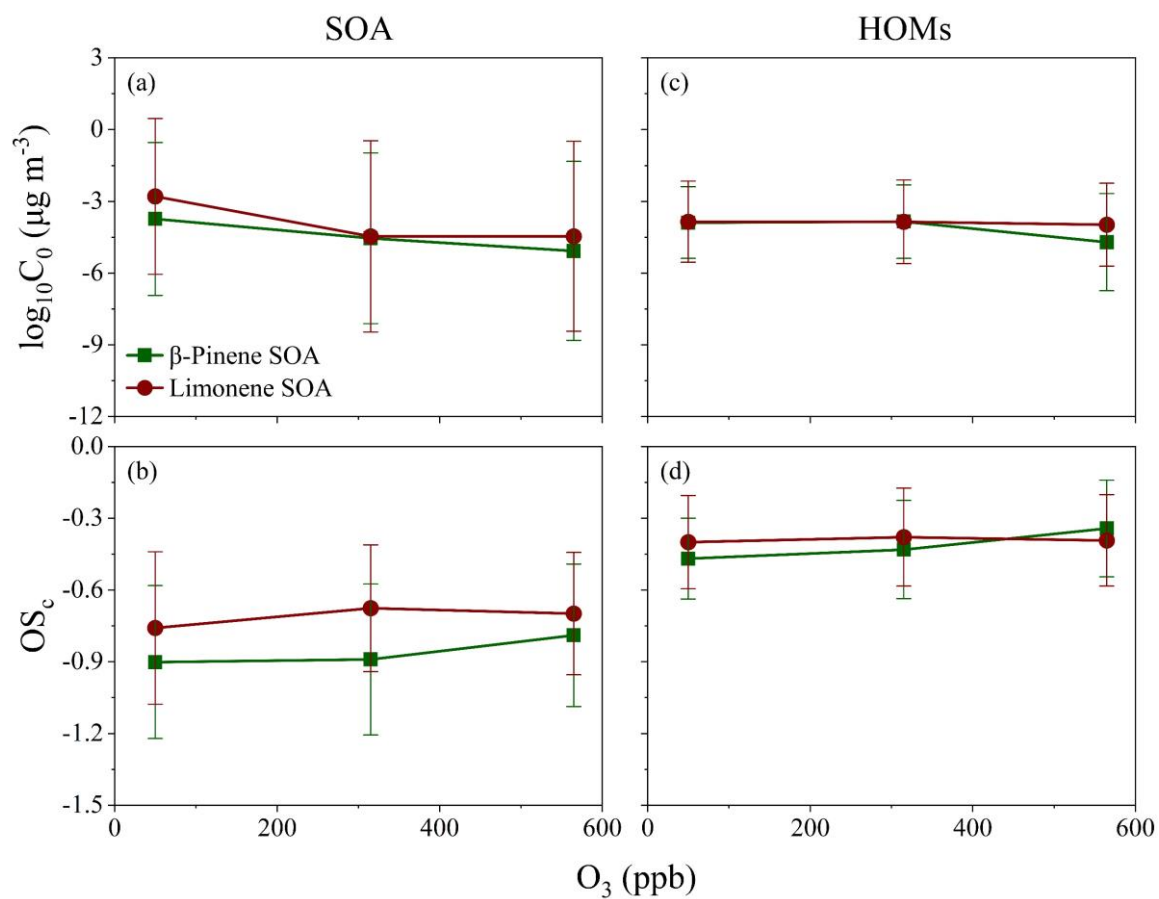

**Figure S3.** Average saturation mass concentration ( $C_0$ ) (a, c) and carbon oxidation state ( $OS_c$ ) (b, d) for organic compounds from  $\beta$ -pinene SOA (green square) and limonene SOA (red circle) and the corresponding HOMs at different ozone concentrations.

## References

- Hammes, J., Lutz, A., Mentel, T., Faxon, C., and Hallquist, M.: Carboxylic acids from limonene oxidation by ozone and hydroxyl radicals: insights into mechanisms derived using a FIGAERO-CIMS, *Atmos. Chem. Phys.*, 19, 13037-13052, <https://doi.org/10.5194/acp-19-13037-2019>, 2019.
- Kahnt, A., Vermeylen, R., Iinuma, Y., Safi Shalamzari, M., Maenhaut, W., and Claeys, M.: High-molecular-weight esters in  $\alpha$ -pinene ozonolysis secondary organic aerosol: structural characterization and mechanistic proposal for their formation from highly oxygenated molecules, *Atmos. Chem. Phys.*, 18, 8453-8467, <https://doi.org/10.5194/acp-18-8453-2018>, 2018.
- Kenseth, C. M., Huang, Y., Zhao, R., Dalleska, N. F., Hethcox, J. C., Stoltz, B. M., and Seinfeld, J. H.: Synergistic  $O_3 + OH$  oxidation pathway to extremely low-volatility dimers revealed in  $\beta$ -pinene secondary organic aerosol, *P. Natl. Acad. Sci.*, 115, 8301-8306, <https://doi.org/10.1073/pnas.1804671115>, 2018.
- Kristensen, K., Jensen, L. N., Glasius, M., and Bilde, M.: The effect of sub-zero temperature on the formation and composition of secondary organic aerosol from ozonolysis of  $\alpha$ -pinene, *Environ. Sci.-Proc. Imp.*, 19, 1220-1234, <https://doi.org/10.1039/c7em00231a>, 2017.
- Kristensen, K., Watne, Å. K., Hammes, J., Lutz, A., Petäjä, T., Hallquist, M., Bilde, M., and Glasius, M.: High-molecular weight dimer esters are major products in aerosols from  $\alpha$ -pinene ozonolysis and the boreal forest, *Environ. Sci. Technol. Lett.*, 3, 280-285, <https://doi.org/10.1021/acs.estlett.6b00152>, 2016.
- Kundu, S., Fisseha, R., Putman, A. L., Rahn, T. A., and Mazzoleni, L. R.: High molecular weight SOA formation during limonene ozonolysis: Insights from ultrahigh-resolution FT-ICR mass spectrometry characterization, *Atmos. Chem. Phys.*, 12, 5523-5536, <https://doi.org/10.5194/acp-12-5523-2012>, 2012.
- Mohr, C., Lopez-Hilfiker, F. D., Yli-Juuti, T., Heitto, A., Lutz, A., Hallquist, M., D'Ambro, E. L., Rissanen, M. P., Hao, L., Schobesberger, S., Kulmala, M., Mauldin III, R. L., Makkonen, U., Sipilä, M., Petäjä, T., and Thornton, J. A.: Ambient observations of dimers from terpene oxidation in the gas phase: Implications for new particle formation and growth, *Geophys. Res. Lett.*, 44, 2958-2966, <https://doi.org/10.1002/2017GL072718>, 2017.
- Müller, L., Reinnig, M.-C., Hayen, H., and Hoffmann, T.: Characterization of oligomeric compounds in secondary organic aerosol using liquid chromatography coupled to electrospray ionization Fourier transform ion cyclotron resonance mass spectrometry, *Rapid Commun. Mass Sp.*, 23, 971-979, <https://doi.org/10.1002/rcm.3957>, 2009.
